# Supplementary material for: Validation of nonalcoholic fatty liver disease (NAFLD) related steatosis indices in metabolic associated fatty liver disease (MAFLD) and comparison of the diagnostic accuracy between NAFLD and MAFLD
Source: PubMed Central journal article supplement — Eur J Gastroenterol Hepatol. 2022 Dec 23;35(4):394–401. doi: 10.1097/MEG.0000000000002497 (PMC9951794; doi:10.1097/meg.0000000000002497), 2022-12-23
Supplement: ejgh-35-394-s001.pdf [file ejgh-35-394-s001.pdf]

Supplementary table 1: Calculations of steatosis indices

| Steatosis indices | Formulae                                                                                                                                                                                                                                                                                                                                                                                       |
|-------------------|------------------------------------------------------------------------------------------------------------------------------------------------------------------------------------------------------------------------------------------------------------------------------------------------------------------------------------------------------------------------------------------------|
| FLI [1]           | $(e^{0.953 \times \text{Loge (triglyceride, mg/dL)} + 0.139 \times \text{BMI (kg/m}^2) + 0.718 \times \text{Loge (GGT, U/L)} + 0.053 \times \text{waist circumference (cm)} - 15.745}) / (1 + e^{0.953 \times \text{Loge (triglyceride, mg/dL)} + 0.139 \times \text{BMI (kg/m}^2) + 0.718 \times \text{Loge (GGT, U/L)} + 0.053 \times \text{waist circumference (cm)} - 15.745}) \times 100$ |
| FSI [2]           | $x = -7.981 + 0.011 \times \text{age (years)} - 0.146 \times \text{sex (female=1, male=0)} + 0.173 \times \text{BMI (kg/m}^2) + 0.007 \times \text{triglycerides (mg/dl)} + 0.593 \times \text{hypertension (yes=1, no=0)} + 0.789 \times \text{diabetes (yes=1, no=0)} + 1.1 \times \text{ALT/AST ratio} \geq 1.33 \text{ (yes=1, no=0); predicted risk} = e^x / (1 + e^x)$                   |
| ZJU [3]           | $\text{BMI (kg/m}^2) + \text{Fasting glucose (mmol/L)} + \text{triglyceride (mmol/L)} + (3 \times \text{ALT/AST Ratio}) (+2, \text{ If Women})$                                                                                                                                                                                                                                                |
| LAP [4]           | $(\text{waist circumference, cm} - 58) \times (\text{triglyceride, mmol/L for Women}); (\text{waist circumference, cm} - 65) \times (\text{triglyceride, mmol/L for Men})$                                                                                                                                                                                                                     |
| HSI [5]           | $8 \times (\text{ALT/AST Ratio}) + \text{BMI (kg/m}^2) (+2, \text{ If Women}; +2, \text{ If diabetes})$                                                                                                                                                                                                                                                                                        |
| VAI [6]           | $[\text{waist circumference, cm} / (39.68 + 1.88 \times \text{BMI, kg/m}^2)] \times (\text{triglyceride, mmol/L} / 1.03) \times (1.31 / \text{HDL, mmol/L}) \text{ for Men}; [\text{waist circumference, cm} / (36.58 + 1.89 \times \text{BMI, kg/m}^2)] \times (\text{triglyceride, mmol/L} / 0.81) \times (1.52 / \text{HDL, mmol/L}) \text{ for Women}$                                     |

Notes: BMI: body mass index; GGT: gamma-glutamyl-transferase; ALT: alanine aminotransferase; AST: aspartate aminotransferase; HDL: high-density lipoprotein; FLI: fatty liver index; FSI: Framingham Steatosis Index; ZJU, Zhejiang University index; LAP, lipid accumulation product; HSI: hepatitis steatosis index; VAI: visceral adiposity index

#### References

1. Bedogni, G., Bellentani, S., Miglioli, L., Masutti, F., Passalacqua, M., Castiglione, A., *et al.* The Fatty Liver Index: a simple and accurate predictor of hepatic steatosis in the general population. *BMC Gastroenterol.* 2006;6:33.
2. Long, M. T., Pedley, A., Colantonio, L. D., Massaro, J. M., Hoffmann, U., Muntner, P., *et al.* Development and Validation of the Framingham Steatosis Index to Identify

Persons With Hepatic Steatosis. *Clin Gastroenterol Hepatol.* 2016;14(8):1172-1180.e2.

3. Wang, J., Xu, C., Xun, Y., Lu, Z., Shi, J., Yu, C., *et al.* ZJU index: a novel model for predicting nonalcoholic fatty liver disease in a Chinese population. *Sci Rep.* 2015;5:16494.
4. Kahn HS. The "lipid accumulation product" performs better than the body mass index for recognizing cardiovascular risk: a population-based comparison [published correction appears in *BMC Cardiovasc Disord.* 2006;6:5]. *BMC Cardiovasc Disord.* 2005;5:26.
5. Lee, J. H., Kim, D., Kim, H. J., Lee, C. H., Yang, J. I., Kim, W., *et al.* Hepatic steatosis index: a simple screening tool reflecting nonalcoholic fatty liver disease. *Dig Liver Dis.* 2010;42(7):503-508.
6. Amato, M. C., Giordano, C., Galia, M., Criscimanna, A., Vitabile, S., Midiri, M., *et al.* Visceral Adiposity Index: a reliable indicator of visceral fat function associated with cardiometabolic risk. *Diabetes Care.* 2010;33(4):920-922.
