# Supplementary material for: Validation of nonalcoholic fatty liver disease (NAFLD) related steatosis indices in metabolic associated fatty liver disease (MAFLD) and comparison of the diagnostic accuracy between NAFLD and MAFLD
Source: PubMed Central journal article supplement — Eur J Gastroenterol Hepatol. 2022 Dec 23;35(4):394–401. doi: 10.1097/MEG.0000000000002497 (PMC9951794; doi:10.1097/meg.0000000000002497), 2022-12-23
Supplement: ejgh-35-394-s002.pdf [file ejgh-35-394-s002.pdf]

Supplementary table 2: Characteristics of the subjects according to MAFLD or NAFLD

| Characteristics                | Non-MAFLD<br>(n = 443)  | MAFLD<br>(n = 262)        | P value   | Non-NAFLD<br>(n = 473)  | NAFLD<br>(n = 232)        | P value   |
|--------------------------------|-------------------------|---------------------------|-----------|-------------------------|---------------------------|-----------|
| Age (year)                     | 45.00<br>(24.00,61.00)  | 54.00<br>(39.25,63.00)    | P < 0.001 | 46.00<br>(26.00,61.00)  | 54.00<br>(39.00,63.00)    | P < 0.001 |
| Female (N, %)                  | 239, 54.0%              | 123, 46.9%                | P = 0.072 | 247, 52.2%              | 115, 49.6%                | P = 0.508 |
| Race (N, %)                    |                         |                           | P = 0.003 |                         |                           | P = 0.032 |
| Mexican American               | 49, 11.1%               | 55, 21.00%                |           | 57, 12.1%               | 47, 20.3%                 |           |
| Other Hispanic                 | 42, 9.5%                | 28, 10.7%                 |           | 46, 9.7%                | 24, 10.3%                 |           |
| Non-Hispanic                   | 260, 58.7%              | 130, 49.6%                |           | 271, 57.3%              | 119, 51.3%                |           |
| Other Race                     | 92, 20.8%               | 49, 18.7%                 |           | 99, 20.9%               | 42, 18.1%                 |           |
| Diabetes (N, %)                | 96, 36.6%               | 62, 14.0%                 | P < 0.001 | 74, 15.6%               | 84, 36.2%                 | P < 0.001 |
| Hypertension<br>(N, %)         | 148, 33.4%              | 144, 55.0%                | P < 0.001 | 168, 35.5%              | 124, 53.4%                | P < 0.001 |
| Significant fibrosis<br>(N, %) | 19, 4.3%                | 50, 19.1%                 | P < 0.001 | 27, 5.7%                | 42, 18.1%                 | P < 0.001 |
| Waist<br>circumference (cm)    | 92.00<br>(80.90,101.50) | 108.75<br>(97.88,118.50)  | P < 0.001 | 93.40<br>(82.00,102.80) | 108.45<br>(97.75,118.62)  | P < 0.001 |
| BMI (kg/m <sup>2</sup> )       | 26.00<br>(22.70,29.70)  | 32.40<br>(28.00,36.77)    | P < 0.001 | 26.10<br>(23.10,30.30)  | 32.20<br>(28.00,36.73)    | P < 0.001 |
| SBP (mmHg)                     | 117.0<br>(108.0,130.0)  | 125.00<br>(116.00,138.00) | P < 0.001 | 118.0<br>(109.0,131.0)  | 125.00<br>(115.00,137.00) | P < 0.001 |
| DBP (mmHg)                     | 70.00<br>(63.00,77.00)  | 74.00<br>(66.25,81.00)    | P < 0.001 | 71.00<br>(64.00,77.00)  | 74.00<br>(66.00,81.00)    | P < 0.001 |
| ALT (U/L)                      | 16.00                   | 24.00                     | P < 0.001 | 16.00                   | 23.00                     | P < 0.001 |

|                 |       |               |               |       |               |               |  |
|-----------------|-------|---------------|---------------|-------|---------------|---------------|--|
|                 |       | (12.00,22.00) | (16.00,35.00) |       | (12.00,24.00) | (16.00,34.00) |  |
| AST (U/L)       | 19.00 | 21.00         | P < 0.001     | 19.00 | 20.00         | P = 0.015     |  |
|                 |       | (16.00,23.00) | (17.00,27.75) |       | (16.00,23.00) | (16.75,27.00) |  |
| HDL (mmol/L)    | 1.37  | 1.14          | P < 0.001     | 1.37  | 1.14          | P < 0.001     |  |
|                 |       | (1.14,1.66)   | (0.98,1.34)   |       | (1.14,1.66)   | (0.98,1.33)   |  |
| TG (mmol/L)     | 0.88  | 1.37          | P < 0.001     | 0.90  | 1.37          | P < 0.001     |  |
|                 |       | (0.63,1.26)   | (0.98,1.89)   |       | (0.64,1.32)   | (0.97,1.93)   |  |
| GGT (U/L)       | 17.00 | 26.00         | P < 0.001     | 18.00 | 24.00         | P < 0.001     |  |
|                 |       | (13.00,27.00) | (19.00,39.00) |       | (13.00,30.00) | (18.00,34.25) |  |
| Fasting glucose | 5.55  | 6.27          | P < 0.001     | 5.55  | 6.22          | P < 0.001     |  |
| (mmol/l)        |       | (5.27,6.05)   | (5.72,7.32)   |       | (5.27,6.11)   | (5.66,7.12)   |  |
| Fasting insulin | 8.06  | 17.07         | P < 0.001     | 8.31  | 17.07         | P < 0.001     |  |
| (mU/ml)         |       | (5.74,12.44)  | (10.73,24.05) |       | (5.86,13.07)  | (10.93,24.83) |  |
| HbA1c           | 5.40  | 5.80          | P < 0.001     | 5.40  | 5.80          | P < 0.001     |  |
|                 |       | (5.20,5.70)   | (5.50,6.60)   |       | (5.20,5.80)   | (5.50,6.60)   |  |
| hs-CRP (mg/L)   | 1.31  | 3.05          | P < 0.001     | 1.36  | 3.16          | P < 0.001     |  |
|                 |       | (0.62,2.98)   | (1.35,5.71)   |       | (0.63,3.08)   | (1.46,5.82)   |  |
| HOMA - IR       | 2.04  | 5.03          | P < 0.001     | 2.16  | 5.12          | P < 0.001     |  |
|                 |       | (1.41,3.27)   | (3.02,7.66)   |       | (1.44,3.60)   | (3.00,7.60)   |  |
| FLI             | 30.81 | 83.74         | P < 0.001     | 36.46 | 83.15         | P < 0.001     |  |
|                 |       | (8.96,61.77)  | (58.27,94.84) |       | (10.46,65.84) | (56.64,94.91) |  |
| FSI             | 11.40 | 47.87         | P < 0.001     | 12.29 | 47.56         | P < 0.001     |  |
|                 |       | (4.33,23.64)  | (23.40,73.65) |       | (4.70,26.62)  | (22.91,74.87) |  |
| ZJU             | 36.14 | 45.32         | P < 0.001     | 36.79 | 45.37         | P < 0.001     |  |
|                 |       | (32.62,41.37) | (41.13,51.25) |       | (32.99,42.05) | (41.08,51.61) |  |

|     |                        |                         |           |                        |                         |           |
|-----|------------------------|-------------------------|-----------|------------------------|-------------------------|-----------|
| LAP | 27.09<br>(14.16,45.52) | 66.60<br>(42.76,102.27) | P < 0.001 | 29.18<br>(15.33,49.21) | 66.61<br>(41.93,105.53) | P < 0.001 |
| HSI | 33.98<br>(30.38,39.49) | 43.67<br>(38.52,49.03)  | P < 0.001 | 34.64<br>(30.70,40.03) | 43.79<br>(38.63,48.92)  | P < 0.001 |
| VAI | 1.08<br>(0.67,1.66)    | 2.02<br>(1.33,3.04)     | P < 0.001 | 1.10<br>(0.68,1.73)    | 2.06<br>(1.37,3.08)     | P < 0.001 |

---

Notes: MAFLD: metabolic dysfunction-associated fatty liver disease; BMI: body mass index; SBP: systolic pressure; DBP: diastolic pressure; ALT: alanine aminotransferase; AST: aspartate aminotransferase; HDL: high-density lipoprotein; TG: triglyceride; GGT: gamma-glutamyl-transferase; HbA1c: Hemoglobin A1c; hs-CRP: high-sensitivity C-reactive protein; HOMA-IR: homeostasis model assessment of insulin resistance; FLI: fatty liver index; FSI: Framingham Steatosis Index; ZJU: Zhejiang University index; LAP: lipid accumulation product; HSI: hepatitis steatosis index; VAI: visceral adiposity index
