# Supplementary material for: Validation of nonalcoholic fatty liver disease (NAFLD) related steatosis indices in metabolic associated fatty liver disease (MAFLD) and comparison of the diagnostic accuracy between NAFLD and MAFLD
Source: PubMed Central journal article supplement — Eur J Gastroenterol Hepatol. 2022 Dec 23;35(4):394–401. doi: 10.1097/MEG.0000000000002497 (PMC9951794; doi:10.1097/meg.0000000000002497), 2022-12-23
Supplement: ejgh-35-394-s003.pdf [file ejgh-35-394-s003.pdf]

Supplementary table 3: Pairwise comparisons of ROC curves of different steatosis indices

| Indices                      | FLI           | FSI           | ZJU           | LAP           | HSI           | VAI           |
|------------------------------|---------------|---------------|---------------|---------------|---------------|---------------|
| Accuracy for MAFLD diagnosis |               |               |               |               |               |               |
| AUROC                        | 0.841         | 0.836         | 0.834         | 0.821         | 0.821         | 0.736         |
| (95% CI)                     | (0.812,0.869) | (0.806,0.866) | (0.805,0.864) | (0.790,0.851) | (0.791,0.852) | (0.698,0.774) |
| FLI                          | —             | —             | —             | —             | —             | —             |
| FSI                          | P = 0.521     | —             | —             | —             | —             | —             |
| ZJU                          | P = 0.482     | P = 0.855     | —             | —             | —             | —             |
| LAP                          | P = 0.065     | P = 0.195     | P = 0.344     | —             | —             | —             |
| HSI                          | P = 0.069     | P = 0.152     | P = 0.021     | P = 0.966     | —             | —             |
| VAI                          | P < 0.001     | —             |
| Accuracy for NAFLD diagnosis |               |               |               |               |               |               |
| AUROC                        | 0.803         | 0.810         | 0.811         | 0.795         | 0.803         | 0.730         |
| (95% CI)                     | (0.771,0.836) | (0.777,0.843) | (0.778,0.843) | (0.762,0.829) | (0.770,0.836) | (0.691,0.770) |
| FLI                          | —             | —             | —             | —             | —             | —             |
| FSI                          | P = 0.416     | —             | —             | —             | —             | —             |
| ZJU                          | P = 0.420     | P = 0.910     | —             | —             | —             | —             |
| LAP                          | P = 0.487     | P = 0.248     | P = 0.305     | —             | —             | —             |
| HSI                          | P = 0.981     | P = 0.524     | P = 0.192     | P = 0.649     | —             | —             |
| VAI                          | P < 0.001     | P < 0.001     | P < 0.001     | P < 0.001     | P = 0.002     | —             |

FLI: fatty liver index; FSI: Framingham steatosis index; ZJU: Zhejiang University index; LAP: lipid accumulation product; HSI: hepatic steatosis index; VAI: visceral adiposity index.
