# Supplementary material for: Validation of nonalcoholic fatty liver disease (NAFLD) related steatosis indices in metabolic associated fatty liver disease (MAFLD) and comparison of the diagnostic accuracy between NAFLD and MAFLD
Source: PubMed Central journal article supplement — Eur J Gastroenterol Hepatol. 2022 Dec 23;35(4):394–401. doi: 10.1097/MEG.0000000000002497 (PMC9951794; doi:10.1097/meg.0000000000002497), 2022-12-23
Supplement: ejgh-35-394-s004.pdf [file ejgh-35-394-s004.pdf]

Supplementary table 4: Diagnostic performances of different steatosis indices

| Index systems                | AUROC                | SEN   | SPE   | PPV   | NPV   | Cut-Off Value |
|------------------------------|----------------------|-------|-------|-------|-------|---------------|
| Diagnostic ability for MAFLD |                      |       |       |       |       |               |
| FLI                          | 0.841 (0.812, 0.869) | 0.760 | 0.743 | 0.636 | 0.839 | 58.17         |
| FSI                          | 0.836 (0.806, 0.866) | 0.790 | 0.729 | 0.633 | 0.855 | 21.31         |
| ZJU                          | 0.834 (0.805, 0.864) | 0.855 | 0.650 | 0.591 | 0.883 | 39.15         |
| LAP                          | 0.821 (0.790, 0.851) | 0.828 | 0.670 | 0.598 | 0.868 | 37.00         |
| HSI                          | 0.821 (0.791, 0.852) | 0.805 | 0.677 | 0.596 | 0.855 | 37.74         |
| VAI                          | 0.736 (0.698, 0.774) | 0.721 | 0.688 | 0.578 | 0.807 | 1.45          |
| Diagnostic ability for NAFLD |                      |       |       |       |       |               |
| FLI                          | 0.803 (0.771,0.836)  | 0.720 | 0.706 | 0.546 | 0.837 | 60.00         |
| FSI                          | 0.810 (0.777,0.843)  | 0.746 | 0.708 | 0.556 | 0.850 | 23.00         |
| ZJU                          | 0.811 (0.778,0.843)  | 0.879 | 0.562 | 0.496 | 0.905 | 38.00         |
| LAP                          | 0.795 (0.762,0.829)  | 0.789 | 0.641 | 0.518 | 0.861 | 38.00         |
| HSI                          | 0.803 (0.770,0.836)  | 0.879 | 0.550 | 0.489 | 0.903 | 36.00         |
| VAI                          | 0.730 (0.691,0.770)  | 0.608 | 0.765 | 0.560 | 0.799 | 1.78          |

AUROC: area under the receiver operating characteristic; SEN: Sensitivity; SPE: Specificity; PPV: Positive predictive value; NPV: Negative predictive value; FLI: fatty liver index; FSI: Framingham steatosis index; ZJU: Zhejiang University index; LAP: lipid accumulation product; HSI: hepatic steatosis index; VAI: visceral adiposity index.
